# Supplementary material for: Factors Associated With Maternal-Reported Actions to Prevent Type 1 Diabetes in the First Year of the TEDDY Study
Source: PubMed Central journal article supplement — Diabetes Care. 2014 Jan 11;37(2):325–31. doi: 10.2337/dc13-0449 (PMC3898752; doi:10.2337/dc13-0449), 2014-01-11
Supplement: supp_dc13-0449v130449_DC130449SupplementaryData.pdf [file supp_dc13-0449v130449_DC130449SupplementaryData.pdf]

## The Teddy Study Group

**Colorado Clinical Center:** Marian Rewers, M.D., Ph.D., PI<sup>1,4,6,10,11</sup>, Katherine Barriga<sup>12</sup>, Kimberly Bautista<sup>12</sup>, Judith Baxter<sup>9,12,15</sup>, George Eisenbarth, M.D., Ph.D., Nicole Frank<sup>2</sup>, Patricia Gesualdo<sup>2,6,12,14,15</sup>, Michelle Hoffman<sup>12,13,14</sup>, Lisa Ide, Rachel Karban<sup>12</sup>, Edwin Liu, M.D.<sup>13</sup>, Jill Norris, Ph.D.<sup>2,3,12</sup>, Kathleen Waugh<sup>7,12,15</sup>, Adela Samper-Imaz, Andrea Steck, M.D.<sup>3</sup>, University of Colorado, Anschutz Medical Campus, Barbara Davis Center for Childhood Diabetes.

**Georgia/Florida Clinical Center:** Jin-Xiong She, Ph.D., PI<sup>1,3,4,11</sup>, †, Desmond Schatz, M.D.\*<sup>4,5,7,8</sup>, Diane Hopkins<sup>12</sup>, Leigh Steed<sup>12,13,14,15</sup>, Jamie Thomas\*<sup>6,12</sup>, Katherine Silvis<sup>2</sup>, Michael Haller, M.D.\*<sup>14</sup>, Meena Shankar\*<sup>2</sup>, Melissa Gardiner, Richard McIndoe, Ph.D., Haitao Liu, M.D.†, John Nechtman†, Ashok Sharma, Joshua Williams, Gabriela Foghis, Stephen W. Anderson, M.D.^ Medical College of Georgia, Georgia Regents University, \*University of Florida, †Jinfiniti Biosciences LLC, Augusta, GA, ^Pediatric Endocrine Associates, Atlanta, GA.

**Germany Clinical Center:** Anette G. Ziegler M.D., PI<sup>1,3,4,11</sup>, Andreas Beyerlein Ph.D.<sup>2</sup>, Ezio Bonifacio Ph.D.\*<sup>5</sup>, Lydia Henneberger<sup>2,12</sup>, Michael Hummel M.D.<sup>13</sup>, Sandra Hummel Ph.D.<sup>2</sup>, Kristina Foterek\*<sup>2</sup>, Mathilde Kersting Ph.D.\*<sup>2</sup>, Annette Knopff<sup>7</sup>, Sibylle Koletzko, M.D.<sup>11,13</sup>, Stephanie Krause, Claudia Peplow<sup>12</sup>, Maren Pflüger Ph.D.<sup>6</sup>, Roswith Roth Ph.D.<sup>9</sup>, Julia Schenkel<sup>2,12</sup>, Joanna Stock<sup>9,12</sup>, Elisabeth Strauss<sup>12</sup>, Katharina Warncke M.D.<sup>14</sup>, Christiane Winkler Ph.D.<sup>2,12,15</sup>, Forschergruppe Diabetes e.V. at Helmholtz Zentrum München, \*Center for Regenerative Therapies, TU Dresden, †Dr. von Hauner Children's Hospital, Department of Gastroenterology, Ludwig Maximilians University Munich, ‡Research Institute for Child Nutrition, Dortmund.

**Finland Clinical Center:** Olli G. Simell, M.D., Ph.D., PI<sup>¥1,4,11,13</sup>, Heikki Hyöty, M.D., Ph.D.\*<sup>±6</sup>, Jorma Ilonen, M.D., Ph.D.¥<sup>13</sup>, Mikael Knip, M.D., Ph.D.\*<sup>±</sup>, Maria Lönnrot, M.D., Ph.D.\*<sup>±6</sup>, Elina Mantymaki¥<sup>^</sup>, Juha Mykkänen, Ph.D.¥<sup>3</sup>, Kirsti Nanto-Salonen, M.D., Ph.D.¥<sup>^12</sup>, Tiina Niininen\*<sup>±12</sup>, Mia Nyblom\*<sup>±</sup>, Anne Riikonen\*<sup>±2</sup>, Minna Romo¥<sup>^</sup>, Barbara Simell¥<sup>^9,12,15</sup>, Tuula Simell, Ph.D.¥<sup>9,12</sup>, Ville Simell¥<sup>^13</sup>, Maija Sjöberg¥<sup>^12,14</sup>, Aino Stenius¥<sup>^12</sup>, Jorma Toppari, M.D., Ph.D., Eeva Varjonen¥<sup>^12</sup>, Riitta Veijola, M.D., Ph.D.µ<sup>±14</sup>, Suvi M. Virtanen, M.D., Ph.D.\*<sup>±§2</sup>. ¥University of Turku, \*University of Tampere, µUniversity of Oulu, ^Turku University Hospital, ±Tampere University Hospital, µOulu University Hospital, §National Institute for Health and Welfare, Finland, ¶University of Kuopio.

**Sweden Clinical Center:** Åke Lernmark, Ph.D., PI<sup>1,3,4,5,6,8,10,11,15</sup>, Daniel Agardh, M.D., Ph.D.<sup>13</sup>, Carin Andrén-Aronsson<sup>2,13</sup>, Maria Ask, Jenny Bremer, Corrado Cilio Ph.D., M.D.<sup>5</sup>, Emilie Ericson-Hallström<sup>2</sup>, Lina Fransson, Thomas Gard, Joanna Gerardsson, Gertie Hansson<sup>12,14</sup>, Monica Hansen, Susanne Hyberg, Fredrik Johansen, Berglind Jonasdottir M.D., Ulla-Marie Karlsson, Helena Larsson M.D., Ph.D.<sup>6,14</sup>, Barbro Lernmark, Ph.D.<sup>9,12</sup>, Maria Markan, Theodosia Massadakis, Jessica Melin<sup>12</sup>, Maria Månsson-Martinez, Anita Nilsson, Kobra Rahmati, Monica Sedig Järvirova, Sara Sibthorpe, Birgitta Sjöberg, Ulrica Swartling, Ph.D.<sup>9,12</sup>, Erika Trulsson, Carina Törn, Ph.D.<sup>3,15</sup>, Anne Wallin, Åsa Wimar<sup>12</sup>, Sofie Åberg. Lund University.

**Washington Clinical Center:** William A. Hagopian, M.D., Ph.D., PI<sup>1,3,4,5,6,7,11,13,14</sup>, Xiang Yan, M.D., Michael Killian<sup>6,7,12,13</sup>, Claire Cowen Crouch<sup>12,14,15</sup>, Kristen M. Hay<sup>2</sup>, Stephen Ayres,

## SUPPLEMENTARY DATA

Carissa Adams, Brandi Bratrude, David Coughlin, Greer Fowler, Czarina Franco, Carla Hammar, Diana Heaney, Patrick Marcus, Arlene Meyer, Denise Mulenga, Elizabeth Scott, Jennifer Skidmore<sup>2</sup>, Joshua Stabbert, Viktoria Stepitova, Nancy Williams. Pacific Northwest Diabetes Research Institute.

**Pennsylvania Satellite Center:** Dorothy Becker, M.D., Margaret Franciscus<sup>12</sup>, MaryEllen Dalmagro-Elias<sup>2</sup>, Ashi Daftary, M.D. Children's Hospital of Pittsburgh of UPMC.

**Data Coordinating Center:** Jeffrey P. Krischer, Ph.D., PI<sup>1,4,5,10,11</sup>, Michael Abbondandolo, Sarah Austin, Rasheedah Brown<sup>12,15</sup>, Brant Burkhardt, Ph.D.<sup>5,6</sup>, Martha Butterworth<sup>2</sup>, David Cuthbertson, Christopher Eberhard, Steven Fiske<sup>9</sup>, Veena Gowda, David Hadley, Ph.D.<sup>3,13</sup>, Hye-Seung Lee, Ph.D.<sup>3,6,13,15</sup>, Shu Liu, Kristian Lynch, Ph.D.<sup>6,9</sup>, Jamie Malloy, Cristina McCarthy<sup>12,15</sup>, Wendy McLeod<sup>2,5,6,13,15</sup>, Laura Smith, Ph.D.<sup>9,12</sup>, Susan Smith<sup>12,15</sup>, Roy Tamura, Ph.D.<sup>2</sup>, Ulla Uusitalo, Ph.D.<sup>2,15</sup>, Kendra Vehik, Ph.D.<sup>4,5,9,14,15</sup>, Earnest Washington, Jimin Yang, Ph.D., R.D.<sup>2,15</sup>. University of South Florida.

**Project scientist:** Beena Akolkar, Ph.D.<sup>1,3,4,5, 6,7,10,11</sup>, National Institutes of Diabetes and Digestive and Kidney Diseases.

**Other contributors:** Kasia Bourcier, Ph.D.<sup>5</sup>, National Institutes of Allergy and Infectious Diseases. Thomas Briese, Ph.D.<sup>6,15</sup>, Columbia University, Suzanne Bennett Johnson, Ph.D.<sup>9,12</sup>, Florida State University, Steve Oberste, Ph.D.<sup>6</sup>, Centers for Disease Control and Prevention, Eric Triplett, Ph.D.<sup>6</sup>, University of Florida.

**Autoantibody Reference Laboratories:** Liping Yu, M.D.<sup>^ 5</sup>, Dongmei Miao, M.D.<sup>^</sup>, Polly Bingley, M.D., FRCP<sup>\*5</sup>, Alistair Williams\*, Kyla Chandler\*, Saba Rokni\*, Anna Long Ph.D.\*<sup>,</sup> Joanna Boldison\*, Jacob Butterly\*, Jessica Broadhurst\*, Gabriella Carreno\*, Rachel Curnock\*, Peter Easton\*, Ivey Geoghan\*, Julia Goode\*, James Pearson\*, Charles Reed\*, Sophie Ridewood\*, Rebecca Wyatt\*. <sup>^</sup>Barbara Davis Center for Childhood Diabetes, University of Colorado Denver, \*School of Clinical Sciences, University of Bristol UK.

**Cortisol Laboratory:** Elisabeth Aardal Eriksson, M.D., Ph.D., Ewa Lönn Karlsson. Department of Clinical Chemistry, Linköping University Hospital, Linköping, Sweden.

**Dietary Biomarkers Laboratory:** Iris Erlund, Ph.D.<sup>2</sup>, Irma Salminen, Jouko Sundvall, Jaana Leiviskä, Mari Lehtonen, Ph.D. National Institute for Health and Welfare, Helsinki, Finland.

**HbA1c Laboratory:** Randie R. Little, Ph.D., Alethea L. Tennill. Diabetes Diagnostic Laboratory, Dept. of Pathology, University of Missouri School of Medicine.

**HLA Reference Laboratory:** Henry Erlich, Ph.D.<sup>3</sup>, Teodorica Bugawan, Maria Alejandrino. Department of Human Genetics, Roche Molecular Systems.

**Metabolomics Laboratory:** Oliver Fiehn, Ph.D., Bill Wikoff, Ph.D., Tobias Kind, Ph.D., Mine Palazoglu, Joyce Wong, Gert Wohlgemuth. UC Davis Metabolomics Center.

## SUPPLEMENTARY DATA

**Microbiome and Viral Metagenomics Laboratory:** Joseph F. Petrosino, Ph.D.<sup>6</sup> Alkek Center for Metagenomics and Microbiome Research, Department of Molecular Virology and Microbiology, Baylor College of Medicine.

**OGTT Laboratory:** Santica M. Marcovina, Ph.D., Sc.D. Northwest Lipid Metabolism and Diabetes Research Laboratories, University of Washington.

**Repository:** Heather Higgins, Sandra Ke. NIDDK Biosample Repository at Fisher BioServices.

**RNA Laboratory and Gene Expression Laboratory:** Jin-Xiong She, Ph.D., PI<sup>1,3,4,11</sup>, Richard McIndoe, Ph.D., Haitao Liu, M.D., John Nechtman, Yansheng Zhao, Na Jiang, M.D. Jinfiniti Biosciences, LLC.

**SNP Laboratory:** Stephen S. Rich, Ph.D.<sup>3</sup>, Wei-Min Chen, Ph.D.<sup>3</sup>, Suna Onengut-Gumuscu, Ph.D.<sup>3</sup>, Emily Farber, Rebecca Roche Pickin, Ph.D., Jordan Davis, Dan Gallo. Center for Public Health Genomics, University of Virginia.

### **Committees:**

<sup>1</sup>Ancillary Studies, <sup>2</sup>Diet, <sup>3</sup>Genetics, <sup>4</sup>Human Subjects/Publicity/Publications, <sup>5</sup>Immune Markers, <sup>6</sup>Infectious Agents, <sup>7</sup>Laboratory Implementation, <sup>8</sup>Maternal Studies, <sup>9</sup>Psychosocial, <sup>10</sup>Quality Assurance, <sup>11</sup>Steering, <sup>12</sup>Study Coordinators, <sup>13</sup>Celiac Disease, <sup>14</sup>Clinical Implementation, <sup>15</sup>Quality Assurance Subcommittee on Data Quality.
